# Supplementary material for: Hollow SnO2/α-Fe2O3spheres with a double-shell structure for gas sensors
Source: Royal Society of Chemistry journal article supplement (doi:10.1039/c3ta13707d), 2013-11-15
Supplement: c3ta13707d.pdf [file c3ta13707d.pdf]

## Hollow $\text{SnO}_2/\alpha\text{-Fe}_2\text{O}_3$ spheres with double-shell structure for gas sensor

Peng Sun<sup>a</sup>, Xin Zhou<sup>a</sup>, Chen Wang<sup>a</sup>, Kengo Shimano<sup>b</sup>, Geyu Lu<sup>\*a</sup> and Noboru Yamazoe<sup>b</sup>

<sup>a</sup> State Key Laboratory on Integrated Optoelectronics, College of Electronic Science and Engineering,

Jilin University, Changchun 130012, People's Republic of China. Fax: +86 431 85167808; Tel: +86

431 85167808; E-mail: [lgy@jlu.edu.cn](mailto:lgy@jlu.edu.cn)

<sup>b</sup> Department of Energy and Material Sciences Faculty of Engineering Sciences, Kyushu University,

Kasuga-shi, Fukuoka 816-8580, Japan.

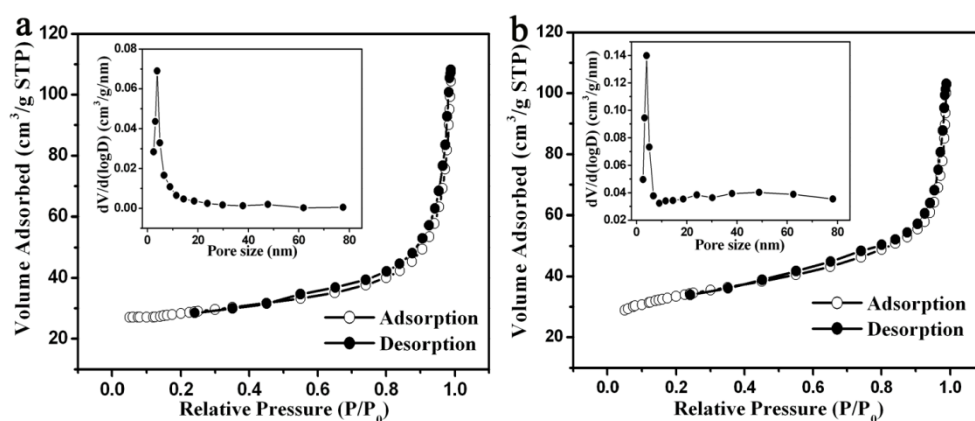

Fig. S1† Nitrogen adsorption-desorption isotherms of (a) hollow  $\text{SnO}_2$  spheres, (b) double-shell  $\text{SnO}_2/\alpha\text{-Fe}_2\text{O}_3$  composites. The insets show corresponding pore size distribution curves.

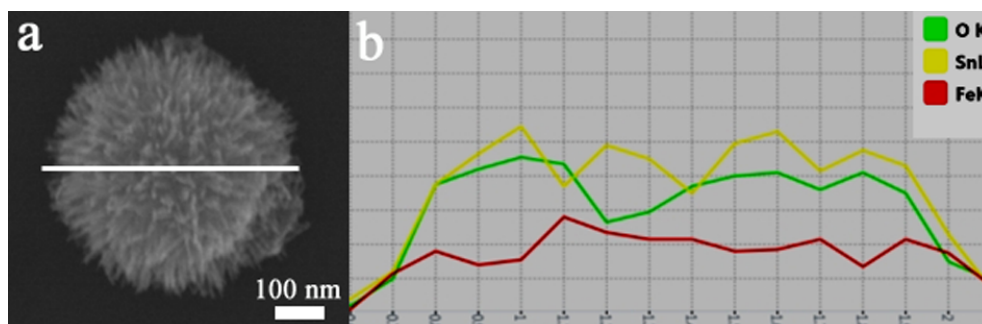

Fig. S2† Energy dispersive spectrum (EDS) of the hierarchical composites.

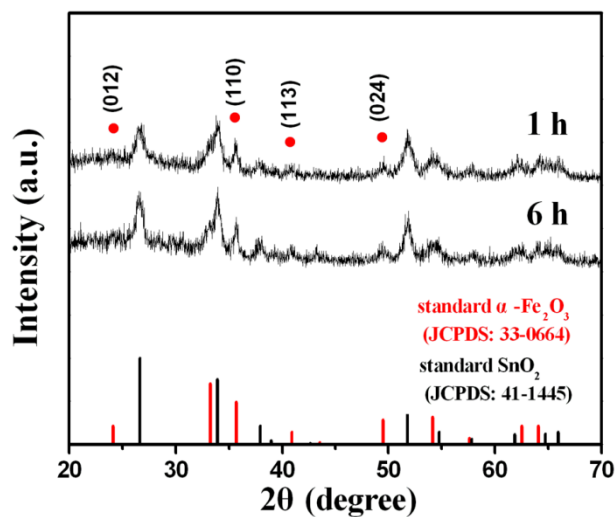

Fig. S3† XRD patterns of the product obtained at various reaction stages after heat treatment.

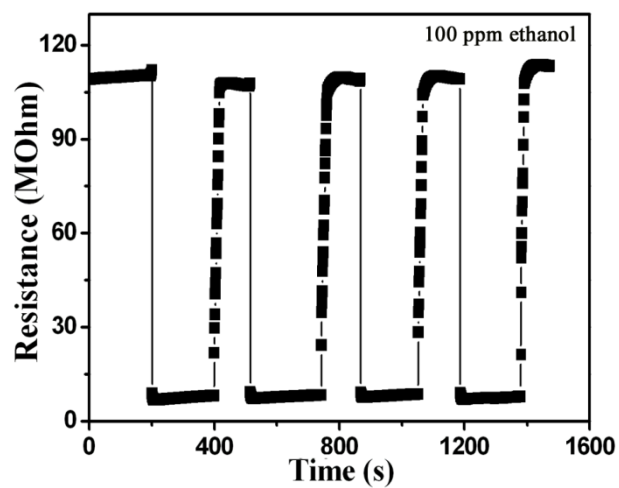

Fig. S4† Displaying four periods of response curve.
